# Supplementary material for: Differential Role of Threonine and Tyrosine Phosphorylation in the Activation and Activity of the Yeast MAPK Slt2
Source: PubMed Central journal article supplement (PMC7866135; doi:10.3390/ijms22031110), 2021-01-23
Supplement: ijms-22-01110-s001.pdf [file ijms-22-01110-s001.pdf]

**Table S1.** Oligonucleotides used in this study.

| Name                                            | Primer                                                         |
|-------------------------------------------------|----------------------------------------------------------------|
| <i>SLT2</i> -5                                  | 5'-CAATTCTGGGAGATGGCTG-3'                                      |
| <i>SLT2</i> -3                                  | 5'-CAAACCTCCGCGGAGTACG-3'                                      |
| <i>SLT2</i> -MNP5                               | 5'-CGAAAACAGTCAATTTTTGGCAGAGGCCCGTGGCCACTAGATGG-3'             |
| <i>SLT2</i> -MNP3                               | 5'-CCATCTAGTGGCCACGGCCTCTGCCAAAAATTGACTGTTTTTCG-3'             |
| <i>SLT2</i> -MSTOP5                             | 5'-GAAGAGCAAAGGCAATTATAATAACAGCAGCAGCAACAGC-3'                 |
| <i>SLT2</i> -MSTOP3                             | 5'-GCTGTTGCTGCTGCTGTTATTATAATTGCCTTTGCTCTTC-3'                 |
| <i>SLT2</i> -CD5                                | 5'-TACTTGTCTATATGGCATAATCCAGCTAACAAATCCTGTGTGTAGTGAAAAAT-3'    |
| <i>SLT2</i> -CD3                                | 5'-ATTTTTCACTACACACAGGATTGTTAGCTGGATTATGCCATATAGACAAGTA-3'     |
| <i>SLT2</i> -T195V5                             | 5'-CGGAGTACGTGGCCGTTAGATGGTATAGAGCTCCGG-3'                     |
| <i>SLT2</i> -T195V3                             | 5'-CCGGAGCTCTATAACCATCTAACGGCCACGTACTIONCCG-3'                 |
| <i>SLT2</i> -Y198F5                             | 5'-CGGAGTACGTGGCCACTAGATGGTTTAGAGCTCCGG-3'                     |
| <i>SLT2</i> -Y198F3                             | 5'-CCGGAGCTCTAAACCATCTAGTGGCCACGTACTIONCCG-3'                  |
| <i>SLT2</i> -T195VY198F5                        | 5'-CGGAGTACGTGGCCGTTAGATGGTTTAGAGCTCCGG-3'                     |
| <i>SLT2</i> -T195VY198F3                        | 5'-CCGGAGCTCTAAACCATCTAACGGCCACGTACTIONCCG-3'                  |
| <i>SLT2</i> -pre121.5                           | 5'-CGAACTGTGCATTCAGTCAG-3'                                     |
| <i>SLT2</i> -post165.3                          | 5'-CGAGCTACAACAAGAGCAC-3'                                      |
| <i>SLT2</i> -preSall.5                          | 5'-GTGAGTTACCTCACTCATTAG-3'                                    |
| <i>SLT2</i> -postEcoRI.3                        | 5'-ACGACGTTGTAACACG-3'                                         |
| <i>SLT2</i> - <i>Clal</i> 6× <i>HisMlu</i> I.5  | 5'-ATCGATATGTCTCATCATCACCACCATCATACGCGTATGGCTGATAAGATAGAGAG-3' |
| <i>SLT2</i> - <i>Clal</i> 6× <i>IHisMlu</i> I.3 | 5'-ACGCGTATGATGGTGGTATGATGAGACATATCGATCTCCCAGAATTGTTATACAC-3'  |
| <i>GFP</i> -5                                   | 5'-CCATCGATATGAGTAAAGGAGAAGAAC-3'                              |
| <i>GFP</i> -3                                   | 5'-CGACGCGTTTTGTATAGTTTCATCCATGC-3'                            |

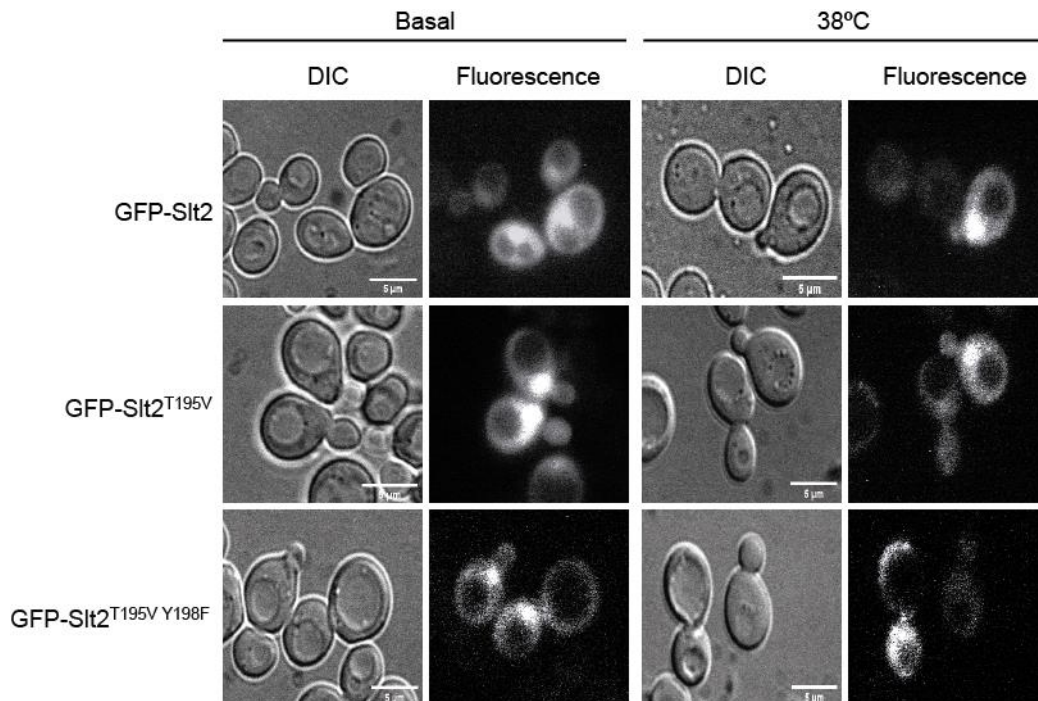

**Figure S1.** Slt2 localization is not affected by T195V and Y198F mutations. DIC (Differential Interference Contrast) and fluorescence microscopy images of BY4741 *slt2Δ* (Y0093 strain) cells expressing GFP-Slt2, GFP-Slt2<sup>T195V</sup> or GFP-Slt2<sup>T195V Y198F</sup>, in basal conditions or under heat treatment (38°C) for 2h. Scale bar = 5μM.
